# Supplementary material for: Deep active learning and knowledge transfer for rapid discovery of lithium metal battery electrolytes
Source: Research Square preprint supplement (doi:10.21203/rs.3.rs-7280900/v1), 2025-08-11
Supplement: Supplementary file 1 [file 0032324a4686b16cbb93d83c.xlsx]

## Sheet: Sheet1
Index	1	2	3	4	5	6	7	8	9	10	11	12	13	14	15	16	17	18	19	20	21	22	23	24
30	1m LiPF6 EC/DMC +free	2m LiPF6 EC/DMC +free	5m LiPF6 EC/DMC +free	1m LiPF6 EC/DMC+VC	2m LiPF6 EC/DMC+VC	5m LiPF6 EC/DMC+VC	1m LiPF6 EC/DMC+FEC	2m LiPF6 EC/DMC+FEC	5m LiPF6 EC/DMC+FEC	1m LiPF6 EC/DMC+LiNO3	2m LiPF6 EC/DMC+LiNO3	5m LiPF6 EC/DMC+LiNO3	1m LiFSI DMC/ES +free	2m LiFSI DMC/ES +free	5m LiFSI DMC/ES +free	1m LiFSI DMC/ES+VC	2m LiFSI DMC/ES+VC	5m LiFSI DMC/ES+VC	1m LiFSI DMC/ES+FEC	2m LiFSI DMC/ES+FEC	5m LiFSI DMC/ES+FEC	1m LiFSI DMC/ES+LiNO3	2m LiFSI DMC/ES+LiNO3	5m LiFSI DMC/ES+LiNO3
29	1m LiTFSI EC/DMC +free	2m LiTFSI EC/DMC +free	5m LiTFSI EC/DMC +free	1m LiTFSI EC/DMC+VC	2m LiTFSI EC/DMC+VC	5m LiTFSI EC/DMC+VC	1m LiTFSI EC/DMC+FEC	2m LiTFSI EC/DMC+FEC	5m LiTFSI EC/DMC+FEC	1m LiTFSI EC/DMC+LiNO3	2m LiTFSI EC/DMC+LiNO3	5m LiTFSI EC/DMC+LiNO3	1m LiDFOB DMC/ES +free	2m LiDFOB DMC/ES +free	5m LiDFOB DMC/ES +free	1m LiDFOB DMC/ES+VC	2m LiDFOB DMC/ES+VC	5m LiDFOB DMC/ES+VC	1m LiDFOB DMC/ES+FEC	2m LiDFOB DMC/ES+FEC	5m LiDFOB DMC/ES+FEC	1m LiDFOB DMC/ES+LiNO3	2m LiDFOB DMC/ES+LiNO3	5m LiDFOB DMC/ES+LiNO3
28	1m LiFSI EC/DMC +free	2m LiFSI EC/DMC +free	5m LiFSI EC/DMC +free	1m LiFSI EC/DMC+VC	2m LiFSI EC/DMC+VC	5m LiFSI EC/DMC+VC	1m LiFSI EC/DMC+FEC	2m LiFSI EC/DMC+FEC	5m LiFSI EC/DMC+FEC	1m LiFSI EC/DMC+LiNO3	2m LiFSI EC/DMC+LiNO3	5m LiFSI EC/DMC+LiNO3	1m LiPF6 DMC/PC +free	2m LiPF6 DMC/PC +free	5m LiPF6 DMC/PC +free	1m LiPF6 DMC/PC+VC	2m LiPF6 DMC/PC+VC	5m LiPF6 DMC/PC+VC	1m LiPF6 DMC/PC+FEC	2m LiPF6 DMC/PC+FEC	5m LiPF6 DMC/PC+FEC	1m LiPF6 DMC/PC+LiNO3	2m LiPF6 DMC/PC+LiNO3	5m LiPF6 DMC/PC+LiNO3
27	1m LiDFOB EC/DMC +free	2m LiDFOB EC/DMC +free	5m LiDFOB EC/DMC +free	1m LiDFOB EC/DMC+VC	2m LiDFOB EC/DMC+VC	5m LiDFOB EC/DMC+VC	1m LiDFOB EC/DMC+FEC	2m LiDFOB EC/DMC+FEC	5m LiDFOB EC/DMC+FEC	1m LiDFOB EC/DMC+LiNO3	2m LiDFOB EC/DMC+LiNO3	5m LiDFOB EC/DMC+LiNO3	1m LiTFSI DMC/PC +free	2m LiTFSI DMC/PC +free	5m LiTFSI DMC/PC +free	1m LiTFSI DMC/PC+VC	2m LiTFSI DMC/PC+VC	5m LiTFSI DMC/PC+VC	1m LiTFSI DMC/PC+FEC	2m LiTFSI DMC/PC+FEC	5m LiTFSI DMC/PC+FEC	1m LiTFSI DMC/PC+LiNO3	2m LiTFSI DMC/PC+LiNO3	5m LiTFSI DMC/PC+LiNO3
26	1m LiPF6 EC/DME +free	2m LiPF6 EC/DME +free	5m LiPF6 EC/DME +free	1m LiPF6 EC/DME+VC	2m LiPF6 EC/DME+VC	5m LiPF6 EC/DME+VC	1m LiPF6 EC/DME+FEC	2m LiPF6 EC/DME+FEC	5m LiPF6 EC/DME+FEC	1m LiPF6 EC/DME+LiNO3	2m LiPF6 EC/DME+LiNO3	5m LiPF6 EC/DME+LiNO3	1m LiFSI DMC/PC +free	2m LiFSI DMC/PC +free	5m LiFSI DMC/PC +free	1m LiFSI DMC/PC+VC	2m LiFSI DMC/PC+VC	5m LiFSI DMC/PC+VC	1m LiFSI DMC/PC+FEC	2m LiFSI DMC/PC+FEC	5m LiFSI DMC/PC+FEC	1m LiFSI DMC/PC+LiNO3	2m LiFSI DMC/PC+LiNO3	5m LiFSI DMC/PC+LiNO3
25	1m LiTFSI EC/DME +free	2m LiTFSI EC/DME +free	5m LiTFSI EC/DME +free	1m LiTFSI EC/DME+VC	2m LiTFSI EC/DME+VC	5m LiTFSI EC/DME+VC	1m LiTFSI EC/DME+FEC	2m LiTFSI EC/DME+FEC	5m LiTFSI EC/DME+FEC	1m LiTFSI EC/DME+LiNO3	2m LiTFSI EC/DME+LiNO3	5m LiTFSI EC/DME+LiNO3	1m LiDFOB DMC/PC +free	2m LiDFOB DMC/PC +free	5m LiDFOB DMC/PC +free	1m LiDFOB DMC/PC+VC	2m LiDFOB DMC/PC+VC	5m LiDFOB DMC/PC+VC	1m LiDFOB DMC/PC+FEC	2m LiDFOB DMC/PC+FEC	5m LiDFOB DMC/PC+FEC	1m LiDFOB DMC/PC+LiNO3	2m LiDFOB DMC/PC+LiNO3	5m LiDFOB DMC/PC+LiNO3
24	1m LiFSI EC/DME +free	2m LiFSI EC/DME +free	5m LiFSI EC/DME +free	1m LiFSI EC/DME+VC	2m LiFSI EC/DME+VC	5m LiFSI EC/DME+VC	1m LiFSI EC/DME+FEC	2m LiFSI EC/DME+FEC	5m LiFSI EC/DME+FEC	1m LiFSI EC/DME+LiNO3	2m LiFSI EC/DME+LiNO3	5m LiFSI EC/DME+LiNO3	1m LiPF6 DME/DOL +free	2m LiPF6 DME/DOL +free	5m LiPF6 DME/DOL +free	1m LiPF6 DME/DOL+VC	2m LiPF6 DME/DOL+VC	5m LiPF6 DME/DOL+VC	1m LiPF6 DME/DOL+FEC	2m LiPF6 DME/DOL+FEC	5m LiPF6 DME/DOL+FEC	1m LiPF6 DME/DOL+LiNO3	2m LiPF6 DME/DOL+LiNO3	5m LiPF6 DME/DOL+LiNO3
23	1m LiDFOB EC/DME +free	2m LiDFOB EC/DME +free	5m LiDFOB EC/DME +free	1m LiDFOB EC/DME+VC	2m LiDFOB EC/DME+VC	5m LiDFOB EC/DME+VC	1m LiDFOB EC/DME+FEC	2m LiDFOB EC/DME+FEC	5m LiDFOB EC/DME+FEC	1m LiDFOB EC/DME+LiNO3	2m LiDFOB EC/DME+LiNO3	5m LiDFOB EC/DME+LiNO3	1m LiTFSI DME/DOL +free	2m LiTFSI DME/DOL +free	5m LiTFSI DME/DOL +free	1m LiTFSI DME/DOL+VC	2m LiTFSI DME/DOL+VC	5m LiTFSI DME/DOL+VC	1m LiTFSI DME/DOL+FEC	2m LiTFSI DME/DOL+FEC	5m LiTFSI DME/DOL+FEC	1m LiTFSI DME/DOL+LiNO3	2m LiTFSI DME/DOL+LiNO3	5m LiTFSI DME/DOL+LiNO3
22	1m LiPF6 EC/DOL +free	2m LiPF6 EC/DOL +free	5m LiPF6 EC/DOL +free	1m LiPF6 EC/DOL+VC	2m LiPF6 EC/DOL+VC	5m LiPF6 EC/DOL+VC	1m LiPF6 EC/DOL+FEC	2m LiPF6 EC/DOL+FEC	5m LiPF6 EC/DOL+FEC	1m LiPF6 EC/DOL+LiNO3	2m LiPF6 EC/DOL+LiNO3	5m LiPF6 EC/DOL+LiNO3	1m LiFSI DME/DOL +free	2m LiFSI DME/DOL +free	5m LiFSI DME/DOL +free	1m LiFSI DME/DOL+VC	2m LiFSI DME/DOL+VC	5m LiFSI DME/DOL+VC	1m LiFSI DME/DOL+FEC	2m LiFSI DME/DOL+FEC	5m LiFSI DME/DOL+FEC	1m LiFSI DME/DOL+LiNO3	2m LiFSI DME/DOL+LiNO3	5m LiFSI DME/DOL+LiNO3
21	1m LiTFSI EC/DOL +free	2m LiTFSI EC/DOL +free	5m LiTFSI EC/DOL +free	1m LiTFSI EC/DOL+VC	2m LiTFSI EC/DOL+VC	5m LiTFSI EC/DOL+VC	1m LiTFSI EC/DOL+FEC	2m LiTFSI EC/DOL+FEC	5m LiTFSI EC/DOL+FEC	1m LiTFSI EC/DOL+LiNO3	2m LiTFSI EC/DOL+LiNO3	5m LiTFSI EC/DOL+LiNO3	1m LiDFOB DME/DOL +free	2m LiDFOB DME/DOL +free	5m LiDFOB DME/DOL +free	1m LiDFOB DME/DOL+VC	2m LiDFOB DME/DOL+VC	5m LiDFOB DME/DOL+VC	1m LiDFOB DME/DOL+FEC	2m LiDFOB DME/DOL+FEC	5m LiDFOB DME/DOL+FEC	1m LiDFOB DME/DOL+LiNO3	2m LiDFOB DME/DOL+LiNO3	5m LiDFOB DME/DOL+LiNO3
20	1m LiFSI EC/DOL +free	2m LiFSI EC/DOL +free	5m LiFSI EC/DOL +free	1m LiFSI EC/DOL+VC	2m LiFSI EC/DOL+VC	5m LiFSI EC/DOL+VC	1m LiFSI EC/DOL+FEC	2m LiFSI EC/DOL+FEC	5m LiFSI EC/DOL+FEC	1m LiFSI EC/DOL+LiNO3	2m LiFSI EC/DOL+LiNO3	5m LiFSI EC/DOL+LiNO3	1m LiPF6 DME/ES +free	2m LiPF6 DME/ES +free	5m LiPF6 DME/ES +free	1m LiPF6 DME/ES+VC	2m LiPF6 DME/ES+VC	5m LiPF6 DME/ES+VC	1m LiPF6 DME/ES+FEC	2m LiPF6 DME/ES+FEC	5m LiPF6 DME/ES+FEC	1m LiPF6 DME/ES+LiNO3	2m LiPF6 DME/ES+LiNO3	5m LiPF6 DME/ES+LiNO3
19	1m LiDFOB EC/DOL +free	2m LiDFOB EC/DOL +free	5m LiDFOB EC/DOL +free	1m LiDFOB EC/DOL+VC	2m LiDFOB EC/DOL+VC	5m LiDFOB EC/DOL+VC	1m LiDFOB EC/DOL+FEC	2m LiDFOB EC/DOL+FEC	5m LiDFOB EC/DOL+FEC	1m LiDFOB EC/DOL+LiNO3	2m LiDFOB EC/DOL+LiNO3	5m LiDFOB EC/DOL+LiNO3	1m LiTFSI DME/ES +free	2m LiTFSI DME/ES +free	5m LiTFSI DME/ES +free	1m LiTFSI DME/ES+VC	2m LiTFSI DME/ES+VC	5m LiTFSI DME/ES+VC	1m LiTFSI DME/ES+FEC	2m LiTFSI DME/ES+FEC	5m LiTFSI DME/ES+FEC	1m LiTFSI DME/ES+LiNO3	2m LiTFSI DME/ES+LiNO3	5m LiTFSI DME/ES+LiNO3
18	1m LiPF6 EC/ES +free	2m LiPF6 EC/ES +free	5m LiPF6 EC/ES +free	1m LiPF6 EC/ES+VC	2m LiPF6 EC/ES+VC	5m LiPF6 EC/ES+VC	1m LiPF6 EC/ES+FEC	2m LiPF6 EC/ES+FEC	5m LiPF6 EC/ES+FEC	1m LiPF6 EC/ES+LiNO3	2m LiPF6 EC/ES+LiNO3	5m LiPF6 EC/ES+LiNO3	1m LiFSI DME/ES +free	2m LiFSI DME/ES +free	5m LiFSI DME/ES +free	1m LiFSI DME/ES+VC	2m LiFSI DME/ES+VC	5m LiFSI DME/ES+VC	1m LiFSI DME/ES+FEC	2m LiFSI DME/ES+FEC	5m LiFSI DME/ES+FEC	1m LiFSI DME/ES+LiNO3	2m LiFSI DME/ES+LiNO3	5m LiFSI DME/ES+LiNO3
17	1m LiTFSI EC/ES +free	2m LiTFSI EC/ES +free	5m LiTFSI EC/ES +free	1m LiTFSI EC/ES+VC	2m LiTFSI EC/ES+VC	5m LiTFSI EC/ES+VC	1m LiTFSI EC/ES+FEC	2m LiTFSI EC/ES+FEC	5m LiTFSI EC/ES+FEC	1m LiTFSI EC/ES+LiNO3	2m LiTFSI EC/ES+LiNO3	5m LiTFSI EC/ES+LiNO3	1m LiDFOB DME/ES +free	2m LiDFOB DME/ES +free	5m LiDFOB DME/ES +free	1m LiDFOB DME/ES+VC	2m LiDFOB DME/ES+VC	5m LiDFOB DME/ES+VC	1m LiDFOB DME/ES+FEC	2m LiDFOB DME/ES+FEC	5m LiDFOB DME/ES+FEC	1m LiDFOB DME/ES+LiNO3	2m LiDFOB DME/ES+LiNO3	5m LiDFOB DME/ES+LiNO3
16	1m LiFSI EC/ES +free	2m LiFSI EC/ES +free	5m LiFSI EC/ES +free	1m LiFSI EC/ES+VC	2m LiFSI EC/ES+VC	5m LiFSI EC/ES+VC	1m LiFSI EC/ES+FEC	2m LiFSI EC/ES+FEC	5m LiFSI EC/ES+FEC	1m LiFSI EC/ES+LiNO3	2m LiFSI EC/ES+LiNO3	5m LiFSI EC/ES+LiNO3	1m LiPF6 DME/PC +free	2m LiPF6 DME/PC +free	5m LiPF6 DME/PC +free	1m LiPF6 DME/PC+VC	2m LiPF6 DME/PC+VC	5m LiPF6 DME/PC+VC	1m LiPF6 DME/PC+FEC	2m LiPF6 DME/PC+FEC	5m LiPF6 DME/PC+FEC	1m LiPF6 DME/PC+LiNO3	2m LiPF6 DME/PC+LiNO3	5m LiPF6 DME/PC+LiNO3
15	1m LiDFOB EC/ES +free	2m LiDFOB EC/ES +free	5m LiDFOB EC/ES +free	1m LiDFOB EC/ES+VC	2m LiDFOB EC/ES+VC	5m LiDFOB EC/ES+VC	1m LiDFOB EC/ES+FEC	2m LiDFOB EC/ES+FEC	5m LiDFOB EC/ES+FEC	1m LiDFOB EC/ES+LiNO3	2m LiDFOB EC/ES+LiNO3	5m LiDFOB EC/ES+LiNO3	1m LiTFSI DME/PC +free	2m LiTFSI DME/PC +free	5m LiTFSI DME/PC +free	1m LiTFSI DME/PC+VC	2m LiTFSI DME/PC+VC	5m LiTFSI DME/PC+VC	1m LiTFSI DME/PC+FEC	2m LiTFSI DME/PC+FEC	5m LiTFSI DME/PC+FEC	1m LiTFSI DME/PC+LiNO3	2m LiTFSI DME/PC+LiNO3	5m LiTFSI DME/PC+LiNO3
14	1m LiPF6 EC/PC +free	2m LiPF6 EC/PC +free	5m LiPF6 EC/PC +free	1m LiPF6 EC/PC+VC	2m LiPF6 EC/PC+VC	5m LiPF6 EC/PC+VC	1m LiPF6 EC/PC+FEC	2m LiPF6 EC/PC+FEC	5m LiPF6 EC/PC+FEC	1m LiPF6 EC/PC+LiNO3	2m LiPF6 EC/PC+LiNO3	5m LiPF6 EC/PC+LiNO3	1m LiFSI DME/PC +free	2m LiFSI DME/PC +free	5m LiFSI DME/PC +free	1m LiFSI DME/PC+VC	2m LiFSI DME/PC+VC	5m LiFSI DME/PC+VC	1m LiFSI DME/PC+FEC	2m LiFSI DME/PC+FEC	5m LiFSI DME/PC+FEC	1m LiFSI DME/PC+LiNO3	2m LiFSI DME/PC+LiNO3	5m LiFSI DME/PC+LiNO3
13	1m LiTFSI EC/PC +free	2m LiTFSI EC/PC +free	5m LiTFSI EC/PC +free	1m LiTFSI EC/PC+VC	2m LiTFSI EC/PC+VC	5m LiTFSI EC/PC+VC	1m LiTFSI EC/PC+FEC	2m LiTFSI EC/PC+FEC	5m LiTFSI EC/PC+FEC	1m LiTFSI EC/PC+LiNO3	2m LiTFSI EC/PC+LiNO3	5m LiTFSI EC/PC+LiNO3	1m LiDFOB DME/PC +free	2m LiDFOB DME/PC +free	5m LiDFOB DME/PC +free	1m LiDFOB DME/PC+VC	2m LiDFOB DME/PC+VC	5m LiDFOB DME/PC+VC	1m LiDFOB DME/PC+FEC	2m LiDFOB DME/PC+FEC	5m LiDFOB DME/PC+FEC	1m LiDFOB DME/PC+LiNO3	2m LiDFOB DME/PC+LiNO3	5m LiDFOB DME/PC+LiNO3
12	1m LiFSI EC/PC +free	2m LiFSI EC/PC +free	5m LiFSI EC/PC +free	1m LiFSI EC/PC+VC	2m LiFSI EC/PC+VC	5m LiFSI EC/PC+VC	1m LiFSI EC/PC+FEC	2m LiFSI EC/PC+FEC	5m LiFSI EC/PC+FEC	1m LiFSI EC/PC+LiNO3	2m LiFSI EC/PC+LiNO3	5m LiFSI EC/PC+LiNO3	1m LiPF6 DOL/ES +free	2m LiPF6 DOL/ES +free	5m LiPF6 DOL/ES +free	1m LiPF6 DOL/ES+VC	2m LiPF6 DOL/ES+VC	5m LiPF6 DOL/ES+VC	1m LiPF6 DOL/ES+FEC	2m LiPF6 DOL/ES+FEC	5m LiPF6 DOL/ES+FEC	1m LiPF6 DOL/ES+LiNO3	2m LiPF6 DOL/ES+LiNO3	5m LiPF6 DOL/ES+LiNO3
11	1m LiDFOB EC/PC +free	2m LiDFOB EC/PC +free	5m LiDFOB EC/PC +free	1m LiDFOB EC/PC+VC	2m LiDFOB EC/PC+VC	5m LiDFOB EC/PC+VC	1m LiDFOB EC/PC+FEC	2m LiDFOB EC/PC+FEC	5m LiDFOB EC/PC+FEC	1m LiDFOB EC/PC+LiNO3	2m LiDFOB EC/PC+LiNO3	5m LiDFOB EC/PC+LiNO3	1m LiTFSI DOL/ES +free	2m LiTFSI DOL/ES +free	5m LiTFSI DOL/ES +free	1m LiTFSI DOL/ES+VC	2m LiTFSI DOL/ES+VC	5m LiTFSI DOL/ES+VC	1m LiTFSI DOL/ES+FEC	2m LiTFSI DOL/ES+FEC	5m LiTFSI DOL/ES+FEC	1m LiTFSI DOL/ES+LiNO3	2m LiTFSI DOL/ES+LiNO3	5m LiTFSI DOL/ES+LiNO3
10	1m LiPF6 DMC/DME +free	2m LiPF6 DMC/DME +free	5m LiPF6 DMC/DME +free	1m LiPF6 DMC/DME+VC	2m LiPF6 DMC/DME+VC	5m LiPF6 DMC/DME+VC	1m LiPF6 DMC/DME+FEC	2m LiPF6 DMC/DME+FEC	5m LiPF6 DMC/DME+FEC	1m LiPF6 DMC/DME+LiNO3	2m LiPF6 DMC/DME+LiNO3	5m LiPF6 DMC/DME+LiNO3	1m LiFSI DOL/ES +free	2m LiFSI DOL/ES +free	5m LiFSI DOL/ES +free	1m LiFSI DOL/ES+VC	2m LiFSI DOL/ES+VC	5m LiFSI DOL/ES+VC	1m LiFSI DOL/ES+FEC	2m LiFSI DOL/ES+FEC	5m LiFSI DOL/ES+FEC	1m LiFSI DOL/ES+LiNO3	2m LiFSI DOL/ES+LiNO3	5m LiFSI DOL/ES+LiNO3
9	1m LiTFSI DMC/DME +free	2m LiTFSI DMC/DME +free	5m LiTFSI DMC/DME +free	1m LiTFSI DMC/DME+VC	2m LiTFSI DMC/DME+VC	5m LiTFSI DMC/DME+VC	1m LiTFSI DMC/DME+FEC	2m LiTFSI DMC/DME+FEC	5m LiTFSI DMC/DME+FEC	1m LiTFSI DMC/DME+LiNO3	2m LiTFSI DMC/DME+LiNO3	5m LiTFSI DMC/DME+LiNO3	1m LiDFOB DOL/ES +free	2m LiDFOB DOL/ES +free	5m LiDFOB DOL/ES +free	1m LiDFOB DOL/ES+VC	2m LiDFOB DOL/ES+VC	5m LiDFOB DOL/ES+VC	1m LiDFOB DOL/ES+FEC	2m LiDFOB DOL/ES+FEC	5m LiDFOB DOL/ES+FEC	1m LiDFOB DOL/ES+LiNO3	2m LiDFOB DOL/ES+LiNO3	5m LiDFOB DOL/ES+LiNO3
8	1m LiFSI DMC/DME +free	2m LiFSI DMC/DME +free	5m LiFSI DMC/DME +free	1m LiFSI DMC/DME+VC	2m LiFSI DMC/DME+VC	5m LiFSI DMC/DME+VC	1m LiFSI DMC/DME+FEC	2m LiFSI DMC/DME+FEC	5m LiFSI DMC/DME+FEC	1m LiFSI DMC/DME+LiNO3	2m LiFSI DMC/DME+LiNO3	5m LiFSI DMC/DME+LiNO3	1m LiPF6 DOL/PC +free	2m LiPF6 DOL/PC +free	5m LiPF6 DOL/PC +free	1m LiPF6 DOL/PC+VC	2m LiPF6 DOL/PC+VC	5m LiPF6 DOL/PC+VC	1m LiPF6 DOL/PC+FEC	2m LiPF6 DOL/PC+FEC	5m LiPF6 DOL/PC+FEC	1m LiPF6 DOL/PC+LiNO3	2m LiPF6 DOL/PC+LiNO3	5m LiPF6 DOL/PC+LiNO3
7	1m LiDFOB DMC/DME +free	2m LiDFOB DMC/DME +free	5m LiDFOB DMC/DME +free	1m LiDFOB DMC/DME+VC	2m LiDFOB DMC/DME+VC	5m LiDFOB DMC/DME+VC	1m LiDFOB DMC/DME+FEC	2m LiDFOB DMC/DME+FEC	5m LiDFOB DMC/DME+FEC	1m LiDFOB DMC/DME+LiNO3	2m LiDFOB DMC/DME+LiNO3	5m LiDFOB DMC/DME+LiNO3	1m LiTFSI DOL/PC +free	2m LiTFSI DOL/PC +free	5m LiTFSI DOL/PC +free	1m LiTFSI DOL/PC+VC	2m LiTFSI DOL/PC+VC	5m LiTFSI DOL/PC+VC	1m LiTFSI DOL/PC+FEC	2m LiTFSI DOL/PC+FEC	5m LiTFSI DOL/PC+FEC	1m LiTFSI DOL/PC+LiNO3	2m LiTFSI DOL/PC+LiNO3	5m LiTFSI DOL/PC+LiNO3
6	1m LiPF6 DMC/DOL +free	2m LiPF6 DMC/DOL +free	5m LiPF6 DMC/DOL +free	1m LiPF6 DMC/DOL+VC	2m LiPF6 DMC/DOL+VC	5m LiPF6 DMC/DOL+VC	1m LiPF6 DMC/DOL+FEC	2m LiPF6 DMC/DOL+FEC	5m LiPF6 DMC/DOL+FEC	1m LiPF6 DMC/DOL+LiNO3	2m LiPF6 DMC/DOL+LiNO3	5m LiPF6 DMC/DOL+LiNO3	1m LiFSI DOL/PC +free	2m LiFSI DOL/PC +free	5m LiFSI DOL/PC +free	1m LiFSI DOL/PC+VC	2m LiFSI DOL/PC+VC	5m LiFSI DOL/PC+VC	1m LiFSI DOL/PC+FEC	2m LiFSI DOL/PC+FEC	5m LiFSI DOL/PC+FEC	1m LiFSI DOL/PC+LiNO3	2m LiFSI DOL/PC+LiNO3	5m LiFSI DOL/PC+LiNO3
5	1m LiTFSI DMC/DOL +free	2m LiTFSI DMC/DOL +free	5m LiTFSI DMC/DOL +free	1m LiTFSI DMC/DOL+VC	2m LiTFSI DMC/DOL+VC	5m LiTFSI DMC/DOL+VC	1m LiTFSI DMC/DOL+FEC	2m LiTFSI DMC/DOL+FEC	5m LiTFSI DMC/DOL+FEC	1m LiTFSI DMC/DOL+LiNO3	2m LiTFSI DMC/DOL+LiNO3	5m LiTFSI DMC/DOL+LiNO3	1m LiDFOB DOL/PC +free	2m LiDFOB DOL/PC +free	5m LiDFOB DOL/PC +free	1m LiDFOB DOL/PC+VC	2m LiDFOB DOL/PC+VC	5m LiDFOB DOL/PC+VC	1m LiDFOB DOL/PC+FEC	2m LiDFOB DOL/PC+FEC	5m LiDFOB DOL/PC+FEC	1m LiDFOB DOL/PC+LiNO3	2m LiDFOB DOL/PC+LiNO3	5m LiDFOB DOL/PC+LiNO3
4	1m LiFSI DMC/DOL +free	2m LiFSI DMC/DOL +free	5m LiFSI DMC/DOL +free	1m LiFSI DMC/DOL+VC	2m LiFSI DMC/DOL+VC	5m LiFSI DMC/DOL+VC	1m LiFSI DMC/DOL+FEC	2m LiFSI DMC/DOL+FEC	5m LiFSI DMC/DOL+FEC	1m LiFSI DMC/DOL+LiNO3	2m LiFSI DMC/DOL+LiNO3	5m LiFSI DMC/DOL+LiNO3	1m LiPF6 ES/PC +free	2m LiPF6 ES/PC +free	5m LiPF6 ES/PC +free	1m LiPF6 ES/PC+VC	2m LiPF6 ES/PC+VC	5m LiPF6 ES/PC+VC	1m LiPF6 ES/PC+FEC	2m LiPF6 ES/PC+FEC	5m LiPF6 ES/PC+FEC	1m LiPF6 ES/PC+LiNO3	2m LiPF6 ES/PC+LiNO3	5m LiPF6 ES/PC+LiNO3
3	1m LiDFOB DMC/DOL +free	2m LiDFOB DMC/DOL +free	5m LiDFOB DMC/DOL +free	1m LiDFOB DMC/DOL+VC	2m LiDFOB DMC/DOL+VC	5m LiDFOB DMC/DOL+VC	1m LiDFOB DMC/DOL+FEC	2m LiDFOB DMC/DOL+FEC	5m LiDFOB DMC/DOL+FEC	1m LiDFOB DMC/DOL+LiNO3	2m LiDFOB DMC/DOL+LiNO3	5m LiDFOB DMC/DOL+LiNO3	1m LiTFSI ES/PC +free	2m LiTFSI ES/PC +free	5m LiTFSI ES/PC +free	1m LiTFSI ES/PC+VC	2m LiTFSI ES/PC+VC	5m LiTFSI ES/PC+VC	1m LiTFSI ES/PC+FEC	2m LiTFSI ES/PC+FEC	5m LiTFSI ES/PC+FEC	1m LiTFSI ES/PC+LiNO3	2m LiTFSI ES/PC+LiNO3	5m LiTFSI ES/PC+LiNO3
2	1m LiPF6 DMC/ES +free	2m LiPF6 DMC/ES +free	5m LiPF6 DMC/ES +free	1m LiPF6 DMC/ES+VC	2m LiPF6 DMC/ES+VC	5m LiPF6 DMC/ES+VC	1m LiPF6 DMC/ES+FEC	2m LiPF6 DMC/ES+FEC	5m LiPF6 DMC/ES+FEC	1m LiPF6 DMC/ES+LiNO3	2m LiPF6 DMC/ES+LiNO3	5m LiPF6 DMC/ES+LiNO3	1m LiFSI ES/PC +free	2m LiFSI ES/PC +free	5m LiFSI ES/PC +free	1m LiFSI ES/PC+VC	2m LiFSI ES/PC+VC	5m LiFSI ES/PC+VC	1m LiFSI ES/PC+FEC	2m LiFSI ES/PC+FEC	5m LiFSI ES/PC+FEC	1m LiFSI ES/PC+LiNO3	2m LiFSI ES/PC+LiNO3	5m LiFSI ES/PC+LiNO3
1	1m LiTFSI DMC/ES +free	2m LiTFSI DMC/ES +free	5m LiTFSI DMC/ES +free	1m LiTFSI DMC/ES+VC	2m LiTFSI DMC/ES+VC	5m LiTFSI DMC/ES+VC	1m LiTFSI DMC/ES+FEC	2m LiTFSI DMC/ES+FEC	5m LiTFSI DMC/ES+FEC	1m LiTFSI DMC/ES+LiNO3	2m LiTFSI DMC/ES+LiNO3	5m LiTFSI DMC/ES+LiNO3	1m LiDFOB ES/PC +free	2m LiDFOB ES/PC +free	5m LiDFOB ES/PC +free	1m LiDFOB ES/PC+VC	2m LiDFOB ES/PC+VC	5m LiDFOB ES/PC+VC	1m LiDFOB ES/PC+FEC	2m LiDFOB ES/PC+FEC	5m LiDFOB ES/PC+FEC	1m LiDFOB ES/PC+LiNO3	2m LiDFOB ES/PC+LiNO3	5m LiDFOB ES/PC+LiNO3
