# Supplementary material for: Deep active learning and knowledge transfer for rapid discovery of lithium metal battery electrolytes
Source: Research Square preprint supplement (doi:10.21203/rs.3.rs-7280900/v1), 2025-08-11
Supplement: Supplementary file 2 [file 6392a2877a945448bb9ac52f.xlsx]

## Sheet: Prior Knowledge
Interaction No.	Soruce (interaction between components)	Target (interaction between components)	Comparison result (Judging by Coulomb efficiency, cycle time of Li-Li symertric cell or cycle time of full cell)	Electrolyte formulas in literature	Main reason for the difference in performance	Reference	Note	Compared with Knowledge from TSC (Interaction No. noted in Sheet 2)
81	1m-LiPF6	1m-LiTFSI	Better	1M LiPF6 PC 1M LiTFSI PC	N/A	74	Conflict with Interaction No. 105	Reversed with Interaction No. 99
1	LiFSI-ES	LiFSI-EC	Better	1.0 m LiFSI EC DES (1:1) 1.0 m LiFSI ES DES (1:1)	Solvation structure	59	Electrolyte composition difference	Reversed with Interaction No. 88
50	5m-DME	1m-DME	Better	1M LiFSI DME 5M LiFSI DME	Superior SEI properties	67		Reversed with Interaction No. 44
126	2m-DME	1m-DME	Better	1M LiTFSI DME DOL (1:1 in volume) 2M LiTFSI DME DOL (1:1 in volume)	Solvation structure	78		Reversed with Interaction No. 43
12	LiDFOB-EC	LiDFOB-PC	Better	1M LiDFOB EC 1M LiDFOB PC	Superior SEI properties	62		Reversed with Interaction No. 414
23	LiFSI-DMC	LiPF6-DMC	Better	1M LiFSI EC DMC (1:1 in volume) 1M LiPF6 EC DMC (1:1 in volume)	Superior SEI properties	65		Reversed with Interaction No. 404
16	1m-DOL	1m-DME	Better	1M LiFSI DOL 4wt.% LiNO3 1M LiFSI DME 4wt.% LiNO3	Polymerization	63	Conflict with Interaction No. 28	Reversed with Interaction No. 39
85	LiDFOB-Free	LiTFSI-Free	Better	1M LiDFOB PC 1M LiTFSI PC	Superior SEI properties	74		Reversed with Interaction No. 384
93	LiDFOB-Free	LiPF6-Free	Better	1M LiDFOB PC 1M LiPF6 PC	Superior SEI properties	74		Reversed with Interaction No. 383
108	LiTFSI-Free	LiPF6-Free	Better	1M LiTFSI EC DMC (1:1 in volume) 1M LiPF6 EC DMC (1:1 in volume)	N/A	75	Conflict with Interaction No. 82	Reversed with Interaction No. 382
119	LiTFSI-Free	LiPF6-Free	Better	1M LiTFSI EC DMC (1:1 in volume) 1M LiPF6 EC DMC (1:1 in volume)	Superior SEI properties	75	Conflict with Interaction No. 82	Reversed with Interaction No. 382
33	1m-PC	1m-DMC	Better	1M LiFSI PC 1M LiFSI DMC	Superior SEI properties	67		Reversed with Interaction No. 369
95	1m-PC	1m-DMC	Better	1M LiPF6 PC 1M LiPF6 DMC	Superior SEI properties	74		Reversed with Interaction No. 369
91	LiDFOB-PC	LiPF6-PC	Better	1M LiDFOB PC 1M LiPF6 PC	Superior SEI properties	74		Reversed with Interaction No. 348
59	PC-VC	PC-FEC	Better	1M LiPF6 PC 2% VC 1M LiPF6 PC 2% FEC	Superior SEI properties	70		Reversed with Interaction No. 341
3	ES-Free	EC-Free	Better	1.0 m LiFSI EC DES (1:1) 1.0 m LiFSI ES DES (1:1)	Solvation structure	59	Electrolyte composition difference	Reversed with Interaction No. 315
83	LiDFOB-PC	LiTFSI-PC	Better	1M LiDFOB PC 1M LiTFSI PC	Superior SEI properties	74		Reversed with Interaction No. 281
80	LiPF6-PC	LiTFSI-PC	Better	1M LiPF6 PC 1M LiTFSI PC	N/A	74		Reversed with Interaction No. 280
92	1m-LiDFOB	1m-LiPF6	Better	1M LiDFOB PC 1M LiPF6 PC	Superior SEI properties	74		Reversed with Interaction No. 240
61	LiPF6-VC	LiPF6-FEC	Better	1M LiPF6 PC 2% VC 1M LiPF6 PC 2% FEC	Superior SEI properties	70	Conflict with Interaction No. 86	Reversed with Interaction No. 214
26	EC-DME	EC-DOL	Better	1.3M LiPF6 EC DOL (gradient concentration) 1.3M LiPF6 EC DME (gradient concentration)	Ability of the cation	66		Reversed with Interaction No. 2
15	LiFSI-DOL	LiFSI-DME	Better	1M LiFSI DOL 4wt.% LiNO3 1M LiFSI DME 4wt.% LiNO3	Polymerization	63		Reversed with Interaction No. 18
60	1m-VC	1m-FEC	Better	1M LiPF6 PC 2% VC 1M LiPF6 PC 2% FEC	Superior SEI properties	70	Conflict with Interaction No. 87	Reversed with Interaction No. 168
120	LiFSI-DME	LiTFSI-DME	Better	1M LiTFSI DME 1M LiFSI DME	Superior SEI properties	76		Reversed with Interaction No. 14
2	1m-ES	1m-EC	Better	1.0 m LiFSI EC DES (1:1) 1.0 m LiFSI ES DES (1:1)	Solvation structure	59	Electrolyte composition difference	Reversed with Interaction No. 105
124	2m-LiTFSI	1m-LiTFSI	Better	1M LiTFSI DME DOL (1:1 in volume) 2M LiTFSI DME DOL (1:1 in volume)	Solvation structure	78		Reversed with Interaction No. 101
84	1m-LiDFOB	1m-LiTFSI	Better	1M LiDFOB PC 1M LiTFSI PC	Superior SEI properties	74		Reversed with Interaction No. 100
105	1m-LiTFSI	1m-LiPF6	Better	1M LiTFSI EC DMC (1:1 in volume) 2 wt.% VC 1M LiPF6 EC DMC (1:1 in volume) 2 wt.% VC	N/A	75	Conflict with Interaction No. 81	Matched with Interaction No. 99
109	1m-LiTFSI	1m-LiPF6	Better	1M LiTFSI EC DMC (1:1 in volume) 1M LiPF6 EC DMC (1:1 in volume)	N/A	75	Conflict with Interaction No. 81	Matched with Interaction No. 99
118	1m-LiTFSI	1m-LiPF6	Better	1M LiTFSI EC DMC (1:1 in volume) 1M LiPF6 EC DMC (1:1 in volume)	Superior SEI properties	75	Conflict with Interaction No. 81	Matched with Interaction No. 99
102	EC-VC	EC-Free	Better	1M LiTFSI EC DMC (1:1 in volume) 2 wt.% VC 1M LiTFSI EC DMC (1:1 in volume)	Superior SEI properties	75		Matched with Interaction No. 92
114	EC-VC	EC-Free	Better	1M LiPF6 EC DMC (1:1 in volume) 2 wt.% VC 1M LiPF6 EC DMC (1:1 in volume)	Superior SEI properties	75		Matched with Interaction No. 92
22	LiFSI-EC	LiPF6-EC	Better	1M LiFSI EC DMC (1:1 in volume) 1M LiPF6 EC DMC (1:1 in volume)	Superior SEI properties	65		Matched with Interaction No. 90
78	DME-FEC	DME-Free	Better	1M LiTFSI DME DOL (2:8 in volume) 3%FEC 1M LiTFSI DME DOL (2:8 in volume)	Superior SEI properties	73		Matched with Interaction No. 80
20	EC-FEC	EC-Free	Better	1M LiPF6 EC DMC (1:1 by vol) 5% FEC 1M LiPF6 EC DMC (1:1 by vol)	Superior SEI properties	64		Matched with Interaction No. 66
68	EC-FEC	EC-Free	Better	1m LiPF6 EC DEC (1:1 by volume) 5% FEC 1m LiPF6 EC DEC (1:1 by volume)	Superior SEI properties	71		Matched with Interaction No. 66
71	EC-FEC	EC-Free	Better	1m LiPF6 EC DEC (1:1 by volume) 5% FEC 1m LiPF6 EC DEC (1:1 by volume)	Superior SEI properties	71		Matched with Interaction No. 66
106	LiTFSI-EC	LiPF6-EC	Better	1M LiTFSI EC DMC (1:1 in volume) 2 wt.% VC 1M LiPF6 EC DMC (1:1 in volume) 2 wt.% VC	N/A	75		Matched with Interaction No. 58
110	LiTFSI-EC	LiPF6-EC	Better	1M LiTFSI EC DMC (1:1 in volume) 1M LiPF6 EC DMC (1:1 in volume)	N/A	75		Matched with Interaction No. 58
116	LiTFSI-EC	LiPF6-EC	Better	1M LiTFSI EC DMC (1:1 in volume) 1M LiPF6 EC DMC (1:1 in volume)	Superior SEI properties	75		Matched with Interaction No. 58
51	LiTFSI-EC	LiTFSI-PC	Better	1.86M LiTFSI EC 1.53M LiTFSI PC	Superior SEI properties	68		Matched with Interaction No. 56
32	PC-Free	DMC-Free	Better	1M LiFSI PC 1M LiFSI DMC	Superior SEI properties	67		Matched with Interaction No. 410
42	PC-Free	DMC-Free	Better	5M LiFSI DMC 5M LiFSI PC	Superior SEI properties	67		Matched with Interaction No. 410
96	PC-Free	DMC-Free	Better	1M LiPF6 PC 1M LiPF6 DMC	Superior SEI properties	74		Matched with Interaction No. 410
34	1m-DME	1m-PC	Better	1M LiFSI DME 1M LiFSI PC	Superior SEI properties	67		Matched with Interaction No. 41
57	1m-DME	1m-PC	Better	1M LiFSI DME 1M LiFSI PC	Superior SEI properties	69		Matched with Interaction No. 41
103	DMC-VC	DMC-Free	Better	1M LiTFSI EC DMC (1:1 in volume) 2 wt.% VC 1M LiTFSI EC DMC (1:1 in volume)	Superior SEI properties	75		Matched with Interaction No. 406
115	DMC-VC	DMC-Free	Better	1M LiPF6 EC DMC (1:1 in volume) 2 wt.% VC 1M LiPF6 EC DMC (1:1 in volume)	Superior SEI properties	75		Matched with Interaction No. 406
11	LiDFOB-ES	LiDFOB-PC	Better	1M LiDFOB ES 1M LiDFOB PC	Superior SEI properties	62		Matched with Interaction No. 396
14	ES-Free	PC-Free	Better	1M LiDFOB ES 1M LiDFOB PC	Superior SEI properties	62		Matched with Interaction No. 391
6	ES-Free	DMC-Free	Better	1m LiClO4 EC ES (1:1 in volume) 1m LiClO4 DMC EC (1:1 in volume)	Solvation structure	60		Matched with Interaction No. 390
28	1m-DME	1m-DOL	Better	1.3M LiPF6 EC DOL (gradient concentration) 1.3M LiPF6 EC DME (gradient concentration)	Ability of the cation	66	Conflict with Interaction No. 16	Matched with Interaction No. 39
82	LiPF6-Free	LiTFSI-Free	Better	1M LiPF6 PC 1M LiTFSI PC	N/A	74	Conflict with Interaction No. 108	Matched with Interaction No. 382
37	1m-DME	1m-DMC	Better	1M LiFSI DME 1M LiFSI DMC	Superior SEI properties	67		Matched with Interaction No. 38
43	5m-PC	5m-DMC	Better	5M LiFSI DMC 5M LiFSI PC	Superior SEI properties	67		Matched with Interaction No. 372
4	EC-ES	EC-DMC	Better	1m LiClO4 EC ES (1:1 in volume) 1m LiClO4 DMC EC (1:1 in volume)	Solvation structure	60		Matched with Interaction No. 356
44	5m-DME	5m-PC	Better	5M LiFSI DME 5M LiFSI PC	Superior SEI properties	67		Matched with Interaction No. 351
47	5m-DME	5m-DMC	Better	5M LiFSI DME 5M LiFSI DMC	Superior SEI properties	67		Matched with Interaction No. 349
94	LiPF6-PC	LiPF6-DMC	Better	1M LiPF6 PC 1M LiPF6 DMC	Superior SEI properties	74		Matched with Interaction No. 347
64	PC-VC	PC-Free	Better	1M LiPF6 PC 2% VC 1M LiPF6 PC	Superior SEI properties	70		Matched with Interaction No. 342
67	PC-FEC	PC-Free	Better	1M LiPF6 PC 2% FEC 1M LiPF6 PC	Superior SEI properties	70		Matched with Interaction No. 340
121	PC-FEC	PC-Free	Better	1M LiPF6 PC 2% FEC 1M LiPF6 PC	Superior SEI properties	77		Matched with Interaction No. 340
53	LiFSI-PC	LiPF6-PC	Better	1M LiFSI PC 1M LiPF6 PC	Superior SEI properties	69		Matched with Interaction No. 318
30	LiFSI-PC	LiFSI-DMC	Better	1M LiFSI PC 1M LiFSI DMC	Superior SEI properties	67		Matched with Interaction No. 317
40	LiFSI-PC	LiFSI-DMC	Better	5M LiFSI DMC 5M LiFSI PC	Superior SEI properties	67		Matched with Interaction No. 317
52	EC-Free	PC-Free	Better	1.86M LiTFSI EC 1.53M LiTFSI PC	Superior SEI properties	68		Matched with Interaction No. 316
90	EC-Free	PC-Free	Better	1 M LiPF6 EC 1 M LiPF6 PC	Superior SEI properties	74		Matched with Interaction No. 316
99	EC-Free	DMC-Free	Better	1 M LiPF6 EC 1 M LiPF6 DMC	Superior SEI properties	74		Matched with Interaction No. 314
79	DOL-FEC	DOL-Free	Better	1M LiTFSI DME DOL (2:8 in volume) 3%FEC 1M LiTFSI DME DOL (2:8 in volume)	Superior SEI properties	73		Matched with Interaction No. 298
107	LiTFSI-DMC	LiPF6-DMC	Better	1M LiTFSI EC DMC (1:1 in volume) 2 wt.% VC 1M LiPF6 EC DMC (1:1 in volume) 2 wt.% VC	N/A	75		Matched with Interaction No. 296
111	LiTFSI-DMC	LiPF6-DMC	Better	1M LiTFSI EC DMC (1:1 in volume) 1M LiPF6 EC DMC (1:1 in volume)	N/A	75		Matched with Interaction No. 296
117	LiTFSI-DMC	LiPF6-DMC	Better	1M LiTFSI EC DMC (1:1 in volume) 1M LiPF6 EC DMC (1:1 in volume)	Superior SEI properties	75		Matched with Interaction No. 296
18	DMC-FEC	DMC-Free	Better	1M LiPF6 EC DMC (1:1 by vol) 5% FEC 1M LiPF6 EC DMC (1:1 by vol)	Superior SEI properties	64		Matched with Interaction No. 285
13	1m-ES	1m-PC	Better	1M LiDFOB ES 1M LiDFOB PC	Superior SEI properties	62		Matched with Interaction No. 283
5	1m-ES	1m-DMC	Better	1m LiClO4 EC ES (1:1 in volume) 1m LiClO4 DMC EC (1:1 in volume)	Solvation structure	60		Matched with Interaction No. 282
62	1m-VC	1m-Free	Better	1M LiPF6 PC 2% VC 1M LiPF6 PC	Superior SEI properties	70		Matched with Interaction No. 267
101	1m-VC	1m-Free	Better	1M LiTFSI EC DMC (1:1 in volume) 2 wt.% VC 1M LiTFSI EC DMC (1:1 in volume)	Superior SEI properties	75		Matched with Interaction No. 267
113	1m-VC	1m-Free	Better	1M LiPF6 EC DMC (1:1 in volume) 2 wt.% VC 1M LiPF6 EC DMC (1:1 in volume)	Superior SEI properties	75		Matched with Interaction No. 267
25	LiFSI-Free	LiPF6-Free	Better	1M LiFSI EC DMC (1:1 in volume) 1M LiPF6 EC DMC (1:1 in volume)	Superior SEI properties	65		Matched with Interaction No. 260
55	LiFSI-Free	LiPF6-Free	Better	1M LiFSI PC 1M LiPF6 PC	Superior SEI properties	69		Matched with Interaction No. 260
63	LiPF6-VC	LiPF6-Free	Better	1M LiPF6 PC 2% VC 1M LiPF6 PC	Superior SEI properties	70		Matched with Interaction No. 246
112	LiPF6-VC	LiPF6-Free	Better	1M LiPF6 EC DMC (1:1 in volume) 2 wt.% VC 1M LiPF6 EC DMC (1:1 in volume)	Superior SEI properties	75		Matched with Interaction No. 246
76	LiTFSI-FEC	LiTFSI-Free	Better	1M LiTFSI DME DOL (2:8 in volume) 3%FEC 1M LiTFSI DME DOL (2:8 in volume)	Superior SEI properties	73		Matched with Interaction No. 24
10	1m-LiNO3	1m-Free	Better	1M LiTFSI DME DOL (1:1 in volume) 2wt% LiNO3 1M LiTFSI DME DOL (1:1 in volume)	Solvation structure	61		Matched with Interaction No. 238
125	2m-DOL	1m-DOL	Better	1M LiTFSI DME DOL (1:1 in volume) 2M LiTFSI DME DOL (1:1 in volume)	Solvation structure	78		Matched with Interaction No. 230
127	2m-Free	1m-Free	Better	1M LiTFSI DME DOL (1:1 in volume) 2M LiTFSI DME DOL (1:1 in volume)	Solvation structure	78		Matched with Interaction No. 224
36	DME-Free	PC-Free	Better	1M LiFSI DME 1M LiFSI PC	Superior SEI properties	67		Matched with Interaction No. 221
46	DME-Free	PC-Free	Better	5M LiFSI DME 5M LiFSI PC	Superior SEI properties	67		Matched with Interaction No. 221
58	DME-Free	PC-Free	Better	1M LiFSI DME 1M LiFSI PC	Superior SEI properties	69		Matched with Interaction No. 221
29	DME-Free	DOL-Free	Better	1.3M LiPF6 EC DOL (gradient concentration) 1.3M LiPF6 EC DME (gradient concentration)	Ability of the cation	66		Matched with Interaction No. 219
39	DME-Free	DMC-Free	Better	1M LiFSI DME 1M LiFSI DMC	Superior SEI properties	67		Matched with Interaction No. 218
49	DME-Free	DMC-Free	Better	5M LiFSI DME 5M LiFSI DMC	Superior SEI properties	67		Matched with Interaction No. 218
86	LiPF6-FEC	LiPF6-VC	Better	1M LiPF6 FEC 1M LiPF6 VC	Superior SEI properties	74	Conflict with Interaction No. 61	Matched with Interaction No. 214
21	LiPF6-FEC	LiPF6-Free	Better	1M LiPF6 EC DMC (1:1 by vol) 5% FEC 1M LiPF6 EC DMC (1:1 by vol)	Superior SEI properties	64		Matched with Interaction No. 213
66	LiPF6-FEC	LiPF6-Free	Better	1M LiPF6 PC 2% FEC 1M LiPF6 PC	Superior SEI properties	70		Matched with Interaction No. 213
70	LiPF6-FEC	LiPF6-Free	Better	1m LiPF6 EC DEC (1:1 by volume) 5% FEC 1m LiPF6 EC DEC (1:1 by volume)	Superior SEI properties	71		Matched with Interaction No. 213
122	LiPF6-FEC	LiPF6-Free	Better	1.0 M LiPF6 PC 2% FEC 1.0 M LiPF6 PC	Superior SEI properties	77		Matched with Interaction No. 213
35	LiFSI-DME	LiFSI-PC	Better	1M LiFSI DME 1M LiFSI PC	Superior SEI properties	67		Matched with Interaction No. 20
45	LiFSI-DME	LiFSI-PC	Better	5M LiFSI DME 5M LiFSI PC	Superior SEI properties	67		Matched with Interaction No. 20
56	LiFSI-DME	LiFSI-PC	Better	1M LiFSI DME 1M LiFSI PC	Superior SEI properties	69		Matched with Interaction No. 20
72	2m-LiNO3	2m-Free	Better	2M LiTFSI DME DOL (1:1 in volume) 0.15MLiNO3 2M LiTFSI DME DOl (1:1 in volume)	Superior SEI properties	72		Matched with Interaction No. 197
88	LiPF6-EC	LiPF6-PC	Better	1 M LiPF6 EC 1 M LiPF6 PC	Superior SEI properties	74		Matched with Interaction No. 195
97	LiPF6-EC	LiPF6-DMC	Better	1 M LiPF6 EC 1 M LiPF6 DMC	Superior SEI properties	74		Matched with Interaction No. 192
24	1m-LiFSI	1m-LiPF6	Better	1M LiFSI EC DMC (1:1 in volume) 1M LiPF6 EC DMC (1:1 in volume)	Superior SEI properties	65		Matched with Interaction No. 172
54	1m-LiFSI	1m-LiPF6	Better	1M LiFSI PC 1M LiPF6 PC	Superior SEI properties	69		Matched with Interaction No. 172
31	LiFSI-DME	LiFSI-DMC	Better	1M LiFSI PC 1M LiFSI DMC	Superior SEI properties	67		Matched with Interaction No. 17
38	LiFSI-DME	LiFSI-DMC	Better	1M LiFSI DME 1M LiFSI DMC	Superior SEI properties	67		Matched with Interaction No. 17
41	LiFSI-DME	LiFSI-DMC	Better	5M LiFSI DMC 5M LiFSI PC	Superior SEI properties	67		Matched with Interaction No. 17
48	LiFSI-DME	LiFSI-DMC	Better	5M LiFSI DME 5M LiFSI DMC	Superior SEI properties	67		Matched with Interaction No. 17
87	1m-FEC	1m-VC	Better	1M LiPF6 FEC 1M LiPF6 VC	Superior SEI properties	74	Conflict with Interaction No. 60	Matched with Interaction No. 168
19	1m-FEC	1m-Free	Better	1M LiPF6 EC DMC (1:1 by vol) 5% FEC 1M LiPF6 EC DMC (1:1 by vol)	Superior SEI properties	64		Matched with Interaction No. 167
65	1m-FEC	1m-Free	Better	1M LiPF6 PC 2% FEC 1M LiPF6 PC	Superior SEI properties	70		Matched with Interaction No. 167
69	1m-FEC	1m-Free	Better	1m LiPF6 EC DEC (1:1 by volume) 5% FEC 1m LiPF6 EC DEC (1:1 by volume)	Superior SEI properties	71		Matched with Interaction No. 167
77	1m-FEC	1m-Free	Better	1M LiTFSI DME DOL (2:8 in volume) 3%FEC 1M LiTFSI DME DOL (2:8 in volume)	Superior SEI properties	73		Matched with Interaction No. 167
123	1m-FEC	1m-Free	Better	1.0 M LiPF6 PC 2% FEC 1.0 M LiPF6 PC	Superior SEI properties	77		Matched with Interaction No. 167
104	LiTFSI-VC	LiPF6-VC	Better	1M LiTFSI EC DMC (1:1 in volume) 2 wt.% VC 1M LiPF6 EC DMC (1:1 in volume) 2 wt.% VC	N/A	75		Matched with Interaction No. 149
100	LiTFSI-VC	LiTFSI-Free	Better	1M LiTFSI EC DMC (1:1 in volume) 2 wt.% VC 1M LiTFSI EC DMC (1:1 in volume)	Superior SEI properties	75		Matched with Interaction No. 147
9	DME-LiNO3	DME-Free	Better	1M LiTFSI DME DOL (1:1 in volume) 2wt% LiNO3 1M LiTFSI DME DOL (1:1 in volume)	Solvation structure	61		Matched with Interaction No. 142
74	DME-LiNO3	DME-Free	Better	2M LiTFSI DME DOL (1:1 in volume) 0.15MLiNO3 2M LiTFSI DME DOl (1:1 in volume)	Superior SEI properties	72		Matched with Interaction No. 142
27	LiPF6-DME	LiPF6-DOL	Better	1.3M LiPF6 EC DOL (gradient concentration) 1.3M LiPF6 EC DME (gradient concentration)	Ability of the cation	66		Matched with Interaction No. 137
17	DOL-LiNO3	DME-LiNO3	Better	1M LiFSI DOL 4wt.% LiNO3 1M LiFSI DME 4wt.% LiNO3	Polymerization	63		Matched with Interaction No. 127
8	DOL-LiNO3	DOL-Free	Better	1M LiTFSI DME DOL (1:1 in volume) 2wt% LiNO3 1M LiTFSI DME DOL (1:1 in volume)	Solvation structure	61		Matched with Interaction No. 123
75	DOL-LiNO3	DOL-Free	Better	2M LiTFSI DME DOL (1:1 in volume) 0.15MLiNO3 2M LiTFSI DME DOl (1:1 in volume)	Superior SEI properties	72		Matched with Interaction No. 123
7	LiTFSI-LiNO3	LiTFSI-Free	Better	1M LiTFSI DME DOL (1:1 in volume) 2wt% LiNO3 1M LiTFSI DME DOL (1:1 in volume)	Solvation structure	61		Matched with Interaction No. 113
73	LiTFSI-LiNO3	LiTFSI-Free	Better	2M LiTFSI DME DOL (1:1 in volume) 0.15MLiNO3 2M LiTFSI DME DOl (1:1 in volume)	Superior SEI properties	72		Matched with Interaction No. 113
89	1m-EC	1m-PC	Better	1 M LiPF6 EC 1 M LiPF6 PC	Superior SEI properties	74		Matched with Interaction No. 106
98	1m-EC	1m-DMC	Better	1 M LiPF6 EC 1 M LiPF6 DMC	Superior SEI properties	74		Matched with Interaction No. 103

## Sheet: Knowledge from TSC
Interaction No.	Soruce (interaction between components)	Soruce value of average degree of interaction between components	Target (interaction between components)	Target value of average degree of interaction between components	Comparison result
1	EC-DOL	113.646	EC-DMC	34.3424	Better
2	EC-DOL	113.646	EC-DME	84.257	Better
3	EC-DOL	113.646	EC-ES	45.0053	Better
4	EC-DOL	113.646	EC-PC	15.2635	Better
5	EC-DOL	113.646	DMC-DOL	14.0689	Better
6	EC-DOL	113.646	DME-DOL	71.7734	Better
7	EC-DOL	113.646	DOL-ES	48.2904	Better
8	EC-DOL	113.646	DOL-PC	43.5103	Better
9	LiTFSI-DME	97.894	LiTFSI-DMC	52.2436	Better
10	LiTFSI-DME	97.894	LiTFSI-DOL	66.3829	Better
11	LiTFSI-DME	97.894	LiTFSI-ES	71.4647	Better
12	LiTFSI-DME	97.894	LiTFSI-PC	54.3468	Better
13	LiTFSI-DME	97.894	LiTFSI-EC	89.0509	Better
14	LiTFSI-DME	97.894	LiFSI-DME	95.8929	Better
15	LiTFSI-DME	97.894	LiPF6-DME	73.0224	Better
16	LiTFSI-DME	97.894	LiDFOB-DME	43.4551	Better
17	LiFSI-DME	95.8929	LiFSI-DMC	28.5264	Better
18	LiFSI-DME	95.8929	LiFSI-DOL	63.1303	Better
19	LiFSI-DME	95.8929	LiFSI-ES	54.8861	Better
20	LiFSI-DME	95.8929	LiFSI-PC	49.3158	Better
21	LiFSI-DME	95.8929	LiFSI-EC	79.8866	Better
22	LiFSI-DME	95.8929	LiPF6-DME	73.0224	Better
23	LiFSI-DME	95.8929	LiDFOB-DME	43.4551	Better
24	LiTFSI-FEC	92.6551	LiTFSI-Free	37.0726	Better
25	LiTFSI-FEC	92.6551	LiTFSI-VC	72.6347	Better
26	LiTFSI-FEC	92.6551	LiTFSI-LiNO3	76.7998	Better
27	LiTFSI-FEC	92.6551	LiFSI-FEC	60.3068	Better
28	LiTFSI-FEC	92.6551	LiPF6-FEC	62.8277	Better
29	LiTFSI-FEC	92.6551	LiDFOB-FEC	20.8435	Better
30	DME-ES	92.4612	DMC-DME	17.5225	Better
31	DME-ES	92.4612	DME-DOL	71.7734	Better
32	DME-ES	92.4612	DME-PC	71.8745	Better
33	DME-ES	92.4612	EC-DME	84.257	Better
34	DME-ES	92.4612	DMC-ES	49.2887	Better
35	DME-ES	92.4612	DOL-ES	48.2904	Better
36	DME-ES	92.4612	ES-PC	25.6627	Better
37	DME-ES	92.4612	EC-ES	45.0053	Better
38	1M-DME	89.6989	1M-DMC	41.875	Better
39	1M-DME	89.6989	1M-DOL	55.4748	Better
40	1M-DME	89.6989	1M-ES	54.2355	Better
41	1M-DME	89.6989	1M-PC	41.0336	Better
42	1M-DME	89.6989	1M-EC	78.942	Better
43	1M-DME	89.6989	2M-DME	87.3963	Better
44	1M-DME	89.6989	5M-DME	45.9081	Better
45	DME-VC	89.6587	DME-Free	62.3893	Better
46	DME-VC	89.6587	DME-FEC	80.3059	Better
47	DME-VC	89.6587	DME-LiNO3	72.7073	Better
48	DME-VC	89.6587	DMC-VC	29.3169	Better
49	DME-VC	89.6587	DOL-VC	40.3854	Better
50	DME-VC	89.6587	ES-VC	48.3782	Better
51	DME-VC	89.6587	PC-VC	47.0226	Better
52	DME-VC	89.6587	EC-VC	79.8803	Better
53	LiTFSI-EC	89.0509	LiTFSI-DMC	52.2436	Better
54	LiTFSI-EC	89.0509	LiTFSI-DOL	66.3829	Better
55	LiTFSI-EC	89.0509	LiTFSI-ES	71.4647	Better
56	LiTFSI-EC	89.0509	LiTFSI-PC	54.3468	Better
57	LiTFSI-EC	89.0509	LiFSI-EC	79.8866	Better
58	LiTFSI-EC	89.0509	LiPF6-EC	65.1925	Better
59	LiTFSI-EC	89.0509	LiDFOB-EC	24.0783	Better
60	2M-DME	87.3963	2M-DMC	34.8463	Better
61	2M-DME	87.3963	2M-DOL	60.5798	Better
62	2M-DME	87.3963	2M-ES	57.5271	Better
63	2M-DME	87.3963	2M-PC	50.9917	Better
64	2M-DME	87.3963	2M-EC	7.49843	Better
65	2M-DME	87.3963	5M-DME	45.9081	Better
66	EC-FEC	84.3607	EC-Free	49.8287	Better
67	EC-FEC	84.3607	EC-VC	79.8803	Better
68	EC-FEC	84.3607	EC-LiNO3	24.1949	Better
69	EC-FEC	84.3607	DMC-FEC	53.8447	Better
70	EC-FEC	84.3607	DME-FEC	80.3059	Better
71	EC-FEC	84.3607	DOL-FEC	51.7444	Better
72	EC-FEC	84.3607	ES-FEC	64.5557	Better
73	EC-FEC	84.3607	PC-FEC	47.5266	Better
74	EC-DME	84.257	EC-DMC	34.3424	Better
75	EC-DME	84.257	EC-ES	45.0053	Better
76	EC-DME	84.257	EC-PC	15.2635	Better
77	EC-DME	84.257	DMC-DME	17.5225	Better
78	EC-DME	84.257	DME-DOL	71.7734	Better
79	EC-DME	84.257	DME-PC	71.8745	Better
80	DME-FEC	80.3059	DME-Free	62.3893	Better
81	DME-FEC	80.3059	DME-LiNO3	72.7073	Better
82	DME-FEC	80.3059	DMC-FEC	53.8447	Better
83	DME-FEC	80.3059	DOL-FEC	51.7444	Better
84	DME-FEC	80.3059	ES-FEC	64.5557	Better
85	DME-FEC	80.3059	PC-FEC	47.5266	Better
86	LiFSI-EC	79.8866	LiFSI-DMC	28.5264	Better
87	LiFSI-EC	79.8866	LiFSI-DOL	63.1303	Better
88	LiFSI-EC	79.8866	LiFSI-ES	54.8861	Better
89	LiFSI-EC	79.8866	LiFSI-PC	49.3158	Better
90	LiFSI-EC	79.8866	LiPF6-EC	65.1925	Better
91	LiFSI-EC	79.8866	LiDFOB-EC	24.0783	Better
92	EC-VC	79.8803	EC-Free	49.8287	Better
93	EC-VC	79.8803	EC-LiNO3	24.1949	Better
94	EC-VC	79.8803	DMC-VC	29.3169	Better
95	EC-VC	79.8803	DOL-VC	40.3854	Better
96	EC-VC	79.8803	ES-VC	48.3782	Better
97	EC-VC	79.8803	PC-VC	47.0226	Better
98	1M-LiTFSI	79.6632	1M-LiFSI	69.0731	Better
99	1M-LiTFSI	79.6632	1M-LiPF6	58.4036	Better
100	1M-LiTFSI	79.6632	1M-LiDFOB	24.0404	Better
101	1M-LiTFSI	79.6632	2M-LiTFSI	76.8263	Better
102	1M-LiTFSI	79.6632	5M-LiTFSI	50.6768	Better
103	1M-EC	78.942	1M-DMC	41.875	Better
104	1M-EC	78.942	1M-DOL	55.4748	Better
105	1M-EC	78.942	1M-ES	54.2355	Better
106	1M-EC	78.942	1M-PC	41.0336	Better
107	1M-EC	78.942	2M-EC	7.49843	Better
108	1M-EC	78.942	5M-EC	19.2267	Better
109	2M-LiTFSI	76.8263	2M-LiFSI	63.2463	Better
110	2M-LiTFSI	76.8263	2M-LiPF6	60.5224	Better
111	2M-LiTFSI	76.8263	2M-LiDFOB	40.9389	Better
112	2M-LiTFSI	76.8263	5M-LiTFSI	50.6768	Better
113	LiTFSI-LiNO3	76.7998	LiTFSI-Free	37.0726	Better
114	LiTFSI-LiNO3	76.7998	LiTFSI-VC	72.6347	Better
115	LiTFSI-LiNO3	76.7998	LiFSI-LiNO3	76.6488	Better
116	LiTFSI-LiNO3	76.7998	LiPF6-LiNO3	53.6942	Better
117	LiTFSI-LiNO3	76.7998	LiDFOB-LiNO3	45.2789	Better
118	LiFSI-LiNO3	76.6488	LiFSI-Free	57.8452	Better
119	LiFSI-LiNO3	76.6488	LiFSI-VC	55.3564	Better
120	LiFSI-LiNO3	76.6488	LiFSI-FEC	60.3068	Better
121	LiFSI-LiNO3	76.6488	LiPF6-LiNO3	53.6942	Better
122	LiFSI-LiNO3	76.6488	LiDFOB-LiNO3	45.2789	Better
123	DOL-LiNO3	74.7701	DOL-Free	50.5734	Better
124	DOL-LiNO3	74.7701	DOL-VC	40.3854	Better
125	DOL-LiNO3	74.7701	DOL-FEC	51.7444	Better
126	DOL-LiNO3	74.7701	DMC-LiNO3	15.0098	Better
127	DOL-LiNO3	74.7701	DME-LiNO3	72.7073	Better
128	DOL-LiNO3	74.7701	ES-LiNO3	67.7357	Better
129	DOL-LiNO3	74.7701	PC-LiNO3	57.8682	Better
130	DOL-LiNO3	74.7701	EC-LiNO3	24.1949	Better
131	5M-LiNO3	73.905	5M-Free	22.2335	Better
132	5M-LiNO3	73.905	5M-VC	33.2394	Better
133	5M-LiNO3	73.905	5M-FEC	58.1741	Better
134	5M-LiNO3	73.905	1M-LiNO3	59.1522	Better
135	5M-LiNO3	73.905	2M-LiNO3	64.568	Better
136	LiPF6-DME	73.0224	LiPF6-DMC	32.3306	Better
137	LiPF6-DME	73.0224	LiPF6-DOL	58.33	Better
138	LiPF6-DME	73.0224	LiPF6-ES	53.272	Better
139	LiPF6-DME	73.0224	LiPF6-PC	45.9118	Better
140	LiPF6-DME	73.0224	LiPF6-EC	65.1925	Better
141	LiPF6-DME	73.0224	LiDFOB-DME	43.4551	Better
142	DME-LiNO3	72.7073	DME-Free	62.3893	Better
143	DME-LiNO3	72.7073	DMC-LiNO3	15.0098	Better
144	DME-LiNO3	72.7073	ES-LiNO3	67.7357	Better
145	DME-LiNO3	72.7073	PC-LiNO3	57.8682	Better
146	DME-LiNO3	72.7073	EC-LiNO3	24.1949	Better
147	LiTFSI-VC	72.6347	LiTFSI-Free	37.0726	Better
148	LiTFSI-VC	72.6347	LiFSI-VC	55.3564	Better
149	LiTFSI-VC	72.6347	LiPF6-VC	58.2783	Better
150	LiTFSI-VC	72.6347	LiDFOB-VC	26.5766	Better
151	DME-PC	71.8745	DMC-DME	17.5225	Better
152	DME-PC	71.8745	DME-DOL	71.7734	Better
153	DME-PC	71.8745	DMC-PC	36.6318	Better
154	DME-PC	71.8745	DOL-PC	43.5103	Better
155	DME-PC	71.8745	ES-PC	25.6627	Better
156	DME-PC	71.8745	EC-PC	15.2635	Better
157	DME-DOL	71.7734	DMC-DME	17.5225	Better
158	DME-DOL	71.7734	DMC-DOL	14.0689	Better
159	DME-DOL	71.7734	DOL-ES	48.2904	Better
160	DME-DOL	71.7734	DOL-PC	43.5103	Better
161	LiTFSI-ES	71.4647	LiTFSI-DMC	52.2436	Better
162	LiTFSI-ES	71.4647	LiTFSI-DOL	66.3829	Better
163	LiTFSI-ES	71.4647	LiTFSI-PC	54.3468	Better
164	LiTFSI-ES	71.4647	LiFSI-ES	54.8861	Better
165	LiTFSI-ES	71.4647	LiPF6-ES	53.272	Better
166	LiTFSI-ES	71.4647	LiDFOB-ES	34.5468	Better
167	1M-FEC	71.1837	1M-Free	42.9598	Better
168	1M-FEC	71.1837	1M-VC	56.4347	Better
169	1M-FEC	71.1837	1M-LiNO3	59.1522	Better
170	1M-FEC	71.1837	2M-FEC	49.8239	Better
171	1M-FEC	71.1837	5M-FEC	58.1741	Better
172	1M-LiFSI	69.0731	1M-LiPF6	58.4036	Better
173	1M-LiFSI	69.0731	1M-LiDFOB	24.0404	Better
174	1M-LiFSI	69.0731	2M-LiFSI	63.2463	Better
175	1M-LiFSI	69.0731	5M-LiFSI	46.7516	Better
176	2M-VC	67.8823	2M-Free	60.9701	Better
177	2M-VC	67.8823	2M-FEC	49.8239	Better
178	2M-VC	67.8823	2M-LiNO3	64.568	Better
179	2M-VC	67.8823	1M-VC	56.4347	Better
180	2M-VC	67.8823	5M-VC	33.2394	Better
181	ES-LiNO3	67.7357	ES-Free	35.2654	Better
182	ES-LiNO3	67.7357	ES-VC	48.3782	Better
183	ES-LiNO3	67.7357	ES-FEC	64.5557	Better
184	ES-LiNO3	67.7357	DMC-LiNO3	15.0098	Better
185	ES-LiNO3	67.7357	PC-LiNO3	57.8682	Better
186	ES-LiNO3	67.7357	EC-LiNO3	24.1949	Better
187	LiTFSI-DOL	66.3829	LiTFSI-DMC	52.2436	Better
188	LiTFSI-DOL	66.3829	LiTFSI-PC	54.3468	Better
189	LiTFSI-DOL	66.3829	LiFSI-DOL	63.1303	Better
190	LiTFSI-DOL	66.3829	LiPF6-DOL	58.33	Better
191	LiTFSI-DOL	66.3829	LiDFOB-DOL	22.2681	Better
192	LiPF6-EC	65.1925	LiPF6-DMC	32.3306	Better
193	LiPF6-EC	65.1925	LiPF6-DOL	58.33	Better
194	LiPF6-EC	65.1925	LiPF6-ES	53.272	Better
195	LiPF6-EC	65.1925	LiPF6-PC	45.9118	Better
196	LiPF6-EC	65.1925	LiDFOB-EC	24.0783	Better
197	2M-LiNO3	64.568	2M-Free	60.9701	Better
198	2M-LiNO3	64.568	2M-FEC	49.8239	Better
199	2M-LiNO3	64.568	1M-LiNO3	59.1522	Better
200	ES-FEC	64.5557	ES-Free	35.2654	Better
201	ES-FEC	64.5557	ES-VC	48.3782	Better
202	ES-FEC	64.5557	DMC-FEC	53.8447	Better
203	ES-FEC	64.5557	DOL-FEC	51.7444	Better
204	ES-FEC	64.5557	PC-FEC	47.5266	Better
205	2M-LiFSI	63.2463	2M-LiPF6	60.5224	Better
206	2M-LiFSI	63.2463	2M-LiDFOB	40.9389	Better
207	2M-LiFSI	63.2463	5M-LiFSI	46.7516	Better
208	LiFSI-DOL	63.1303	LiFSI-DMC	28.5264	Better
209	LiFSI-DOL	63.1303	LiFSI-ES	54.8861	Better
210	LiFSI-DOL	63.1303	LiFSI-PC	49.3158	Better
211	LiFSI-DOL	63.1303	LiPF6-DOL	58.33	Better
212	LiFSI-DOL	63.1303	LiDFOB-DOL	22.2681	Better
213	LiPF6-FEC	62.8277	LiPF6-Free	37.614	Better
214	LiPF6-FEC	62.8277	LiPF6-VC	58.2783	Better
215	LiPF6-FEC	62.8277	LiPF6-LiNO3	53.6942	Better
216	LiPF6-FEC	62.8277	LiFSI-FEC	60.3068	Better
217	LiPF6-FEC	62.8277	LiDFOB-FEC	20.8435	Better
218	DME-Free	62.3893	DMC-Free	27.7145	Better
219	DME-Free	62.3893	DOL-Free	50.5734	Better
220	DME-Free	62.3893	ES-Free	35.2654	Better
221	DME-Free	62.3893	PC-Free	27.9962	Better
222	DME-Free	62.3893	EC-Free	49.8287	Better
223	2M-Free	60.9701	2M-FEC	49.8239	Better
224	2M-Free	60.9701	1M-Free	42.9598	Better
225	2M-Free	60.9701	5M-Free	22.2335	Better
226	2M-DOL	60.5798	2M-DMC	34.8463	Better
227	2M-DOL	60.5798	2M-ES	57.5271	Better
228	2M-DOL	60.5798	2M-PC	50.9917	Better
229	2M-DOL	60.5798	2M-EC	7.49843	Better
230	2M-DOL	60.5798	1M-DOL	55.4748	Better
231	2M-DOL	60.5798	5M-DOL	40.8111	Better
232	2M-LiPF6	60.5224	2M-LiDFOB	40.9389	Better
233	2M-LiPF6	60.5224	1M-LiPF6	58.4036	Better
234	2M-LiPF6	60.5224	5M-LiPF6	40.7241	Better
235	LiFSI-FEC	60.3068	LiFSI-Free	57.8452	Better
236	LiFSI-FEC	60.3068	LiFSI-VC	55.3564	Better
237	LiFSI-FEC	60.3068	LiDFOB-FEC	20.8435	Better
238	1M-LiNO3	59.1522	1M-Free	42.9598	Better
239	1M-LiNO3	59.1522	1M-VC	56.4347	Better
240	1M-LiPF6	58.4036	1M-LiDFOB	24.0404	Better
241	1M-LiPF6	58.4036	5M-LiPF6	40.7241	Better
242	LiPF6-DOL	58.33	LiPF6-DMC	32.3306	Better
243	LiPF6-DOL	58.33	LiPF6-ES	53.272	Better
244	LiPF6-DOL	58.33	LiPF6-PC	45.9118	Better
245	LiPF6-DOL	58.33	LiDFOB-DOL	22.2681	Better
246	LiPF6-VC	58.2783	LiPF6-Free	37.614	Better
247	LiPF6-VC	58.2783	LiPF6-LiNO3	53.6942	Better
248	LiPF6-VC	58.2783	LiFSI-VC	55.3564	Better
249	LiPF6-VC	58.2783	LiDFOB-VC	26.5766	Better
250	5M-FEC	58.1741	5M-Free	22.2335	Better
251	5M-FEC	58.1741	5M-VC	33.2394	Better
252	5M-FEC	58.1741	2M-FEC	49.8239	Better
253	PC-LiNO3	57.8682	PC-Free	27.9962	Better
254	PC-LiNO3	57.8682	PC-VC	47.0226	Better
255	PC-LiNO3	57.8682	PC-FEC	47.5266	Better
256	PC-LiNO3	57.8682	DMC-LiNO3	15.0098	Better
257	PC-LiNO3	57.8682	EC-LiNO3	24.1949	Better
258	LiFSI-Free	57.8452	LiFSI-VC	55.3564	Better
259	LiFSI-Free	57.8452	LiTFSI-Free	37.0726	Better
260	LiFSI-Free	57.8452	LiPF6-Free	37.614	Better
261	LiFSI-Free	57.8452	LiDFOB-Free	33.8211	Better
262	2M-ES	57.5271	2M-DMC	34.8463	Better
263	2M-ES	57.5271	2M-PC	50.9917	Better
264	2M-ES	57.5271	2M-EC	7.49843	Better
265	2M-ES	57.5271	1M-ES	54.2355	Better
266	2M-ES	57.5271	5M-ES	48.3338	Better
267	1M-VC	56.4347	1M-Free	42.9598	Better
268	1M-VC	56.4347	5M-VC	33.2394	Better
269	1M-DOL	55.4748	1M-DMC	41.875	Better
270	1M-DOL	55.4748	1M-ES	54.2355	Better
271	1M-DOL	55.4748	1M-PC	41.0336	Better
272	1M-DOL	55.4748	5M-DOL	40.8111	Better
273	LiFSI-VC	55.3564	LiDFOB-VC	26.5766	Better
274	LiFSI-ES	54.8861	LiFSI-DMC	28.5264	Better
275	LiFSI-ES	54.8861	LiFSI-PC	49.3158	Better
276	LiFSI-ES	54.8861	LiPF6-ES	53.272	Better
277	LiFSI-ES	54.8861	LiDFOB-ES	34.5468	Better
278	LiTFSI-PC	54.3468	LiTFSI-DMC	52.2436	Better
279	LiTFSI-PC	54.3468	LiFSI-PC	49.3158	Better
280	LiTFSI-PC	54.3468	LiPF6-PC	45.9118	Better
281	LiTFSI-PC	54.3468	LiDFOB-PC	26.7522	Better
282	1M-ES	54.2355	1M-DMC	41.875	Better
283	1M-ES	54.2355	1M-PC	41.0336	Better
284	1M-ES	54.2355	5M-ES	48.3338	Better
285	DMC-FEC	53.8447	DMC-Free	27.7145	Better
286	DMC-FEC	53.8447	DMC-VC	29.3169	Better
287	DMC-FEC	53.8447	DMC-LiNO3	15.0098	Better
288	DMC-FEC	53.8447	DOL-FEC	51.7444	Better
289	DMC-FEC	53.8447	PC-FEC	47.5266	Better
290	LiPF6-LiNO3	53.6942	LiPF6-Free	37.614	Better
291	LiPF6-LiNO3	53.6942	LiDFOB-LiNO3	45.2789	Better
292	LiPF6-ES	53.272	LiPF6-DMC	32.3306	Better
293	LiPF6-ES	53.272	LiPF6-PC	45.9118	Better
294	LiPF6-ES	53.272	LiDFOB-ES	34.5468	Better
295	LiTFSI-DMC	52.2436	LiFSI-DMC	28.5264	Better
296	LiTFSI-DMC	52.2436	LiPF6-DMC	32.3306	Better
297	LiTFSI-DMC	52.2436	LiDFOB-DMC	11.7714	Better
298	DOL-FEC	51.7444	DOL-Free	50.5734	Better
299	DOL-FEC	51.7444	DOL-VC	40.3854	Better
300	DOL-FEC	51.7444	PC-FEC	47.5266	Better
301	2M-PC	50.9917	2M-DMC	34.8463	Better
302	2M-PC	50.9917	2M-EC	7.49843	Better
303	2M-PC	50.9917	1M-PC	41.0336	Better
304	2M-PC	50.9917	5M-PC	41.3127	Better
305	5M-LiTFSI	50.6768	5M-LiFSI	46.7516	Better
306	5M-LiTFSI	50.6768	5M-LiPF6	40.7241	Better
307	5M-LiTFSI	50.6768	5M-LiDFOB	29.0427	Better
308	DOL-Free	50.5734	DOL-VC	40.3854	Better
309	DOL-Free	50.5734	DMC-Free	27.7145	Better
310	DOL-Free	50.5734	ES-Free	35.2654	Better
311	DOL-Free	50.5734	PC-Free	27.9962	Better
312	DOL-Free	50.5734	EC-Free	49.8287	Better
313	EC-Free	49.8287	EC-LiNO3	24.1949	Better
314	EC-Free	49.8287	DMC-Free	27.7145	Better
315	EC-Free	49.8287	ES-Free	35.2654	Better
316	EC-Free	49.8287	PC-Free	27.9962	Better
317	LiFSI-PC	49.3158	LiFSI-DMC	28.5264	Better
318	LiFSI-PC	49.3158	LiPF6-PC	45.9118	Better
319	LiFSI-PC	49.3158	LiDFOB-PC	26.7522	Better
320	DMC-ES	49.2887	DMC-DME	17.5225	Better
321	DMC-ES	49.2887	DMC-DOL	14.0689	Better
322	DMC-ES	49.2887	DMC-PC	36.6318	Better
323	DMC-ES	49.2887	EC-DMC	34.3424	Better
324	DMC-ES	49.2887	DOL-ES	48.2904	Better
325	DMC-ES	49.2887	ES-PC	25.6627	Better
326	DMC-ES	49.2887	EC-ES	45.0053	Better
327	ES-VC	48.3782	ES-Free	35.2654	Better
328	ES-VC	48.3782	DMC-VC	29.3169	Better
329	ES-VC	48.3782	DOL-VC	40.3854	Better
330	ES-VC	48.3782	PC-VC	47.0226	Better
331	5M-ES	48.3338	5M-DMC	9.54318	Better
332	5M-ES	48.3338	5M-DME	45.9081	Better
333	5M-ES	48.3338	5M-DOL	40.8111	Better
334	5M-ES	48.3338	5M-PC	41.3127	Better
335	5M-ES	48.3338	5M-EC	19.2267	Better
336	DOL-ES	48.2904	DMC-DOL	14.0689	Better
337	DOL-ES	48.2904	DOL-PC	43.5103	Better
338	DOL-ES	48.2904	ES-PC	25.6627	Better
339	DOL-ES	48.2904	EC-ES	45.0053	Better
340	PC-FEC	47.5266	PC-Free	27.9962	Better
341	PC-FEC	47.5266	PC-VC	47.0226	Better
342	PC-VC	47.0226	PC-Free	27.9962	Better
343	PC-VC	47.0226	DMC-VC	29.3169	Better
344	PC-VC	47.0226	DOL-VC	40.3854	Better
345	5M-LiFSI	46.7516	5M-LiPF6	40.7241	Better
346	5M-LiFSI	46.7516	5M-LiDFOB	29.0427	Better
347	LiPF6-PC	45.9118	LiPF6-DMC	32.3306	Better
348	LiPF6-PC	45.9118	LiDFOB-PC	26.7522	Better
349	5M-DME	45.9081	5M-DMC	9.54318	Better
350	5M-DME	45.9081	5M-DOL	40.8111	Better
351	5M-DME	45.9081	5M-PC	41.3127	Better
352	5M-DME	45.9081	5M-EC	19.2267	Better
353	LiDFOB-LiNO3	45.2789	LiDFOB-Free	33.8211	Better
354	LiDFOB-LiNO3	45.2789	LiDFOB-VC	26.5766	Better
355	LiDFOB-LiNO3	45.2789	LiDFOB-FEC	20.8435	Better
356	EC-ES	45.0053	EC-DMC	34.3424	Better
357	EC-ES	45.0053	EC-PC	15.2635	Better
358	EC-ES	45.0053	ES-PC	25.6627	Better
359	DOL-PC	43.5103	DMC-DOL	14.0689	Better
360	DOL-PC	43.5103	DMC-PC	36.6318	Better
361	DOL-PC	43.5103	ES-PC	25.6627	Better
362	DOL-PC	43.5103	EC-PC	15.2635	Better
363	LiDFOB-DME	43.4551	LiDFOB-DMC	11.7714	Better
364	LiDFOB-DME	43.4551	LiDFOB-DOL	22.2681	Better
365	LiDFOB-DME	43.4551	LiDFOB-ES	34.5468	Better
366	LiDFOB-DME	43.4551	LiDFOB-PC	26.7522	Better
367	LiDFOB-DME	43.4551	LiDFOB-EC	24.0783	Better
368	1M-Free	42.9598	5M-Free	22.2335	Better
369	1M-DMC	41.875	1M-PC	41.0336	Better
370	1M-DMC	41.875	2M-DMC	34.8463	Better
371	1M-DMC	41.875	5M-DMC	9.54318	Better
372	5M-PC	41.3127	5M-DMC	9.54318	Better
373	5M-PC	41.3127	5M-DOL	40.8111	Better
374	5M-PC	41.3127	5M-EC	19.2267	Better
375	5M-PC	41.3127	1M-PC	41.0336	Better
376	2M-LiDFOB	40.9389	1M-LiDFOB	24.0404	Better
377	2M-LiDFOB	40.9389	5M-LiDFOB	29.0427	Better
378	5M-DOL	40.8111	5M-DMC	9.54318	Better
379	5M-DOL	40.8111	5M-EC	19.2267	Better
380	5M-LiPF6	40.7241	5M-LiDFOB	29.0427	Better
381	DOL-VC	40.3854	DMC-VC	29.3169	Better
382	LiPF6-Free	37.614	LiTFSI-Free	37.0726	Better
383	LiPF6-Free	37.614	LiDFOB-Free	33.8211	Better
384	LiTFSI-Free	37.0726	LiDFOB-Free	33.8211	Better
385	DMC-PC	36.6318	DMC-DME	17.5225	Better
386	DMC-PC	36.6318	DMC-DOL	14.0689	Better
387	DMC-PC	36.6318	EC-DMC	34.3424	Better
388	DMC-PC	36.6318	ES-PC	25.6627	Better
389	DMC-PC	36.6318	EC-PC	15.2635	Better
390	ES-Free	35.2654	DMC-Free	27.7145	Better
391	ES-Free	35.2654	PC-Free	27.9962	Better
392	2M-DMC	34.8463	2M-EC	7.49843	Better
393	2M-DMC	34.8463	5M-DMC	9.54318	Better
394	LiDFOB-ES	34.5468	LiDFOB-DMC	11.7714	Better
395	LiDFOB-ES	34.5468	LiDFOB-DOL	22.2681	Better
396	LiDFOB-ES	34.5468	LiDFOB-PC	26.7522	Better
397	LiDFOB-ES	34.5468	LiDFOB-EC	24.0783	Better
398	EC-DMC	34.3424	EC-PC	15.2635	Better
399	EC-DMC	34.3424	DMC-DME	17.5225	Better
400	EC-DMC	34.3424	DMC-DOL	14.0689	Better
401	LiDFOB-Free	33.8211	LiDFOB-VC	26.5766	Better
402	LiDFOB-Free	33.8211	LiDFOB-FEC	20.8435	Better
403	5M-VC	33.2394	5M-Free	22.2335	Better
404	LiPF6-DMC	32.3306	LiFSI-DMC	28.5264	Better
405	LiPF6-DMC	32.3306	LiDFOB-DMC	11.7714	Better
406	DMC-VC	29.3169	DMC-Free	27.7145	Better
407	DMC-VC	29.3169	DMC-LiNO3	15.0098	Better
408	5M-LiDFOB	29.0427	1M-LiDFOB	24.0404	Better
409	LiFSI-DMC	28.5264	LiDFOB-DMC	11.7714	Better
410	PC-Free	27.9962	DMC-Free	27.7145	Better
411	DMC-Free	27.7145	DMC-LiNO3	15.0098	Better
412	LiDFOB-PC	26.7522	LiDFOB-DMC	11.7714	Better
413	LiDFOB-PC	26.7522	LiDFOB-DOL	22.2681	Better
414	LiDFOB-PC	26.7522	LiDFOB-EC	24.0783	Better
415	LiDFOB-VC	26.5766	LiDFOB-FEC	20.8435	Better
416	ES-PC	25.6627	EC-PC	15.2635	Better
417	EC-LiNO3	24.1949	DMC-LiNO3	15.0098	Better
418	LiDFOB-EC	24.0783	LiDFOB-DMC	11.7714	Better
419	LiDFOB-EC	24.0783	LiDFOB-DOL	22.2681	Better
420	LiDFOB-DOL	22.2681	LiDFOB-DMC	11.7714	Better
421	5M-EC	19.2267	5M-DMC	9.54318	Better
422	5M-EC	19.2267	2M-EC	7.49843	Better
423	DMC-DME	17.5225	DMC-DOL	14.0689	Better
